# Supplementary material for: Rod photoreceptor-specific deletion of cytosolic aspartate aminotransferase, GOT1, causes retinal degeneration
Source: Front Ophthalmol (Lausanne). Author manuscript; Available in PMC 2024 May 9. (PMC11081273; doi:10.3389/fopht.2023.1306019)
Supplement: Supp Table2 [file NIHMS1984497-supplement-Supp_Table2.xlsx]

## Sheet: Sheet1
Compound Method		cKO_1	cKO_2	cKO_3	cKO_4	cKO_5	WT_1	WT_2	WT_3	WT_4	WT_5
Name	Transition	Area	Area	Area	Area	Area	Area	Area	Area	Area	Area
±-Mevalonolactone	189.1 -> 59.1	151.517	11.0842	41.9895	55.1499	69.6875	36.006	49.8506	54.2596	30.8826	10.0786
2-2-Dimethyl Succinic acid	145.1 -> 101.1	42126.4	23832.8	27571.2	39582.5	44411.2	22221.9	46689.5	50221.7	30568.3	42580.2
2-3-Dihydroxybenzoic acid	153.0 -> 109.0	173.582	68.7521	123.814	244.264	16.2048	68.4315	192.262	279.385	73.3475	174.091
2-3-Dihydroxyisovalerate	133.1 -> 75.1	151.766	192.061	1140.32	75.1082	60.75	16.0752	30.9741	44.5983	79.7315	40.978
2-3-Pyridinedicarboxylic acid	166.0 -> 122.0	7314.39	8876.88	3653.5	7324.03	8247.95	5431.12	6833.82	3042.05	4383.73	6458.36
2-4-Quinolinediol	160.0 -> 117.9	23.0991	25.9579	62.6523	62.1557	152.717	184.93	80.599	86.5829	36.4035	103.901
2-Deoxyadenosine 5-diphosphate	410.0 -> 158.7	133.803	29.8415	27.1297	32.9772	10.8514	4.77617	13.998	19.213	8.70438	30.1716
2-Deoxyadenosine 5-monophosphate	330.0 -> 79.0	23.8583	28.8987	34.2631	83.4612	148.597	25.0761	33.661	26.1383	11.3211	28.7462
2-Deoxyadenosine	310.1 -> 250.0	5770.62	4307.69	890.503	3518.87	1739.2	606.758	1238.41	1936.63	25.0368	4450.15
2-Deoxycytidine 5-diphosphate	386.0 -> 97.0	163.562	32.951	31.649	9.78264	14.2821	27.5992	14.9046	154.852	15.8778	73.8607
2-Deoxycytidine 5-monophosphate	306.0 -> 79.0	15.1566	528.332	64.8224	5.55233	37.5717	24.2103	147.261	32.5366	56.0016	11.4778
2-Deoxycytidine	286.1 -> 226.0	765.403	113.737	276.319	570.343	711.498	210.753	93.7116	447.1	336.884	231.325
2-Deoxy-D-glucose 6-phosphate	243.0 -> 79.1	439.621	237.628	215.875	305.888	261.676	92.0189	234.191	176.197	78.6008	134.205
2-Deoxy-D-ribose	193.1 -> 59.2	685.272	687.689	1607.11	818.136	452.79	1450.93	122.491	532.834	703.991	399.23
2-Deoxyguanosine 5-diphosphate	426.0 -> 79.1	126749	114367	128000	116789	48567.6	125600	101338	76975.2	69710.6	85033.8
2-Deoxyguanosine 5-monophosphate	346.0 -> 79.1	432079	236580	310156	356418	267805	607607	327021	279853	155642	216547
2-Deoxyguanosine	266.1 -> 150.0	16.0252	12.0784	12.4689	6.68279	10.5234	8.40236	3.56245	7.17167	10.0699	3.58389
2-Deoxyinosine	251.1 -> 135.0	4.07414	25.8513	16.3796	1.53333	8.49307	3.92157	26.9622	14.5908	4.28001	2.12567
2-Deoxyribose 5-phosphate	213.0 -> 79.1	177.739	130.931	214.696	281.315	60.76	44.4118	49.9364	40.6347	74.9049	237.425
2-Deoxyuridine 5-triphosphate	467.0 -> 158.8	18.7562	3.27361	32.6579	7.57843	13.1425	8.23949	6.46029	13.7216	10.3208	1.5936
2-Deoxyuridine	227.1 -> 184.0	858.206	620.635	1001.63	775.694	483.926	479.068	470.76	269.34	312.319	287.93
2-Isopropylmalic acid	175.1 -> 115.0	60068.9	65162.3	70892.7	70399.2	53200.5	55224.2	44489.7	39571.6	38473.7	36048.6
2-Ketobutyrate	101.0 -> 57.2	18536.7	12919.4	2296.92	18247.5	1962.04	15552.4	17965	879.255	574.975	8507.54
2-Methyl-1-butanol	87.1 -> 43.3	66891.7	37352.6	28825.2	35813.9	60055.2	96649.4	62454.8	69883.1	50082.6	45049.7
2-Phosphoglyceric acid	185.0 -> 79.0	31794.8	53032.7	75379.1	70157.6	29258.5	26836.6	29984.8	17583.3	22814.9	21510.9
3-2-Hydroxyethylindole	160.1 -> 142.1	91.6424	24.8286	16.0385	99.7845	164.834	40.0803	80.1129	53.1286	347.378	75.4811
3-Dehydroshikimic acid	171.0 -> 127.0	258.517	155.531	102.5	498.727	115.581	200.317	162.805	420.71	166.976	85.7418
3-Hydroxyanthranilic acid	152.0 -> 108.0	18.1087	9.99421	18.5394	6.51381	4.66369	20.664	32.4205	3.63512	10.0776	51.6526
3-Hydroxy-DL-kynurenine	223.1 -> 162.0	48.8858	9.01653	6.86332	16.6839	5.68566	4.64719	41.2101	21.0332	27.857	21.3437
3-Hydroxyphenylacetic acid	151.0 -> 107.1	74.5527	130.097	252.732	140.657	87.9257	29.371	161.245	17.4349	21.0961	27.4924
3-Indoleacetic acid	174.1 -> 130.0	248.779	476.474	268.038	152.071	80.3608	56.7886	931.25	507.681	105.091	68.4808
3-Methylglutaric acid	145.1 -> 101.1	47880.8	38346.5	43694.5	43741	60908.1	82809.8	76934.3	57460.2	24596.1	53977.7
4-Aminobenzoic acid	136.0 -> 92.0	9.52443	7.72427	15.175	4.17768	8.7998	9.17395	15.8905	12.8251	14.6214	14.8477
4-Guanidobutyric acid	144.1 -> 102.0	15.6472	224.175	68.5032	235.866	68.5699	33.4623	39.0236	81.0369	49.1422	94.1056
4-Hydroxybenzoic acid	137.0 -> 93.0	253.376	3042.47	182.102	3148.04	147.653	2955.64	2350.89	2104.77	3121	1690.8
4-Hydroxy-L-glutamic acid	162.0 -> 144.0	23.5034	73.9349	31.2935	285.055	63.3127	18.6724	24.8584	120.878	41.7557	46.3064
4-Hydroxyphenyl-pyruvic acid	179.0 -> 107.0	33.5262	32.5865	414.435	22.8941	26.1771	533.509	24.249	18.5193	12.9259	46.7163
4-Methyl-2-oxovaleric acid	129.1 -> 85.1	73340	110594	101301	92352.4	108168	111277	106259	107759	121173	107276
4-Pyridoxic acid	182.0 -> 138.0	72.3186	95.5992	30.7441	239.391	117.157	115.224	315.533	60.8848	59.2522	11.8827
4-Quinolinol	144.0 -> 116.0	22.7502	0.998666	11.6797	31.3926	13.0524	9.14277	7.63959	8.84107	3.34122	15.279
5-Deoxy-5-(methylthio)adenosine	356.1 -> 134.0	15269.6	16191.8	19030.3	20482.2	16662.5	13370.2	15685.3	11279.6	11091.1	10533.7
5-Hydroxy-3-indoleacetic acid	190.1 -> 144.0	19.7398	18.3571	25.9773	17.2512	25.1899	13.8393	26.4371	11.2789	12.8869	20.5364
5-Methoxytryptamine	189.1 -> 174.0	1.37452	0.571447	29.1439	1.36865	1.47301	26.7133	0.648431	12.3072	13.6998	1.60736
6-Hydroxynicotinic acid	138.0 -> 42.3	81.4743	140.511	74.2373	95.5351	34.039	64.438	164.118	75.5296	53.2834	82.3435
Acetoacetate Neg	101.0 -> 57.1	177.064	133.268	201.538	3605.76	255.433	328.268	81.6773	89.8918	134.634	206.645
Adenine	134.0 -> 107.0	117.797	1230.06	1202.19	1725.38	2023.54	1031.53	1162.77	562.163	422.471	884.164
Adenosine 3-5-cyclic monophosphate	328.0 -> 134.0	5861.76	4722.4	1405.63	3495.44	3743.62	2302.37	4819.09	4179.7	4548.95	4297.52
Adenosine 5-diphosphate	426.0 -> 328.0	80348.9	71878.9	79163.8	74602.2	30092.6	76542.8	70091.3	47536.7	42299.3	51422.7
Adenosine 5-monophosphate	346.0 -> 79.0	507535	277733	359572	421539	306881	713766	374927	325652	183903	247610
Adenosine 5-triphosphate	506.0 -> 159.0	525.038	1337.12	955.481	815.804	14.7418	820.785	6121.02	499.939	372.17	1641.56
Adenosine	326.1 -> 134.0	80.2784	56.3397	1207.68	7230.16	15219	2709.9	3059.35	2738.46	1780.28	80.431
Adenylosuccinic acid	462.0 -> 97.0	350.211	221.319	590.127	303.128	869.347	3183.26	236.648	1033.72	771.426	831.779
Adipic acid	145.1 -> 101.1	9324.7	5310.48	4657.22	1913.07	6619.48	6129.08	79452.6	6119.02	5259.83	5676.92
AICAR	257.1 -> 125.0	25.785	14.3851	20.3275	17.1075	574.552	35.3349	11.6174	24.2427	10.3527	14.1607
Allantoin	157.0 -> 97.0	239.045	349.728	280.117	318.259	188.249	346.691	260.243	160.741	483.48	1041.79
alpha-D(+)Mannose 1-phosphate	259.0 -> 79.0	24180.7	28368.6	44276.7	41811.7	21195.6	12001.8	26748.5	20609.7	19307.2	6708.34
alpha-D-Glucose-1-phosphate	259.0 -> 79.0	7553.55	40260.5	58109.6	49164.2	15281.6	14710.5	20948.2	8675.05	8814.53	8051.3
alpha-Ketoglutaric acid	145.0 -> 101.0	19930.3	19749.7	18240.7	26628.2	20887.4	23574.2	17067.3	15412.6	22449.6	24070.1
Arabinose-5-phosphate	229.0 -> 79.0	8838.53	11700.8	19655.2	14718.9	14271.5	10238.5	17584.3	13550.4	12348.8	5913.98
Argininosuccinic acid	289.0 -> 88.0	86.4003	55.3914	127.035	156.765	9.0741	9.46769	22.3504	2.46086	2.4281	11.9861
Beta hydroxybutryic acid	103.0 -> 59.1	188417	81979.2	105574	113540	284219	243909	78678.5	79884.6	114341	169759
beta-Nicotinamide adenine dinucleotide	662.1 -> 540.0	555626	577365	567476	601977	427737	492393	507749	404917	400523	409436
beta-Nicotinamide mononucleotide	333.0 -> 251.1	67.1597	47.5922	106.322	60.4124	36.6214	414.097	60.5517	146.566	57.8327	81.9797
Cellobiose	341.1 -> 161.0	314.484	266.552	219.345	196.108	209.285	191.582	162.61	153.435	61.9133	216.706
Chorismic acid	225.0 -> 189.0	770.263	823.951	524.472	823.83	872.931	665.398	176.05	672.609	377.639	1816.34
cis-Aconitic acid	173.0 -> 129.0	114860	187269	253565	199817	88501.6	175480	196178	92753.6	111886	125639
Citramalic acid	147.0 -> 85.1	72197.1	69749.6	84071.1	88053.9	101419	119634	94779.2	88757.4	87853.9	79803.6
Citric acid	191.0 -> 111.0	2.61998e+06	1.95034e+06	995308	1.0118e+06	1.03102e+06	836374	828234	876497	1.30299e+06	967612
CoA	766.1 -> 408.1	216.174	249.921	254.867	556.541	112.546	371.301	197.16	275.122	58.8262	437.53
Creatine phosphate	210.0 -> 96.9	508.755	41.2397	221.295	93.9429	125.83	42.446	75.262	150.989	83.9648	354.129
Creatine	130.1 -> 88.1	229954	216053	203352	241617	249514	185006	154246	200968	204338	194826
Creatinine	112.0 -> 41.2	1049.81	819.061	774.446	245.916	292.287	194.739	368.606	109.478	378.501	259.871
Cysteine	120.0 -> 33.2	36.3231	18.1075	32.9651	17.9792	28.8526	14.2529	23.9085	10.9232	6.2998	8.75732
Cytidine 5-diphosphate	402.0 -> 79.0	5001.3	4325.05	6986.32	7204.65	3526.15	6343.26	4631.45	2543.21	2670.05	3216.23
Cytidine 5-triphosphate	482.0 -> 158.8	94.2088	71.0547	100.211	53.9596	76.4189	36.3919	76.9291	67.5222	38.4592	31.5731
Cytidine	242.1 -> 109.0	117.548	38.93	184.504	81.2851	236.875	49.7416	35.8707	40.9881	95.2863	174.882
Cytidine-5-monophosphate	322.0 -> 79.0	10877	9207.9	11482.5	13378.1	10212.6	21507.7	9935.04	6290.49	5656.76	6971.44
Cytosine	110.0 -> 42.2	11.4598		1.46875	0.235295	0.66074	17.7	1.16635	0.290092	0.484392	18.3702
D-+-Galactosamine	238.1 -> 159.9	10.8094	35.3936	24.5593	59.4106	11.6279	38.0653	34.3732	56.8629	17.791	36.8848
Deoxyadenosine 5-triphosphate	490.0 -> 158.9	5.63662	4.92154	12.605	23.5262	13.5114	22.6993	17.7354	9.06886	6.13045	6.52556
Deoxycytidine 5-triphosphate	466.0 -> 158.9	10.8056	35.3649	15.7329	9.91634	8.57439	16.3222	12.8316	7.6016	12.1584	14.2554
Deoxyguanosine 5-triphosphate	506.0 -> 158.8	1254.62	4274.14	1576.05	5916.11	2428.77	2536.51	6585.99	1422.73	2249.08	1259.15
Deoxythymidine 5-triphosphate	481.0 -> 158.8	6098.79	7728.24	7304.48	7524.19	2695.45	3955.39	5494.71	5411.53	6222.7	5752.01
D-erythro-Dihydrosphingosine	300.3 -> 199.0	2412.49	3039.12	5303.91	4526.12	3062.47	4461.72	4896.11	1907.74	1146.32	1750.67
D-Fructose 1,6-biphosphate	338.9 -> 97.0	16548.9	12406.9	10275.9	14903	5751.11	13252.2	6973.18	7622.66	2737.82	12767.6
D-Fructose 6-phosphate	259.0 -> 79.0	22001.7	1541.24	9432.94	29228.1	1882.76	15021.4	4278.91	7530.58	26783.2	12165.5
D-Gluconic acid	195.1 -> 129.0	1164.26	123.859	1312.65	3103.43	2423.75	786.904	1722.84	159.53	138.272	373.068
D-Glucosamine 6-phosphate	258.0 -> 79.0	190.501	229.115	64.3601	121.43	70.0307	42.3113	19.7853	177.056	99.3657	274.415
D-Glucose 6-phosphate	259.0 -> 79.0	20879.8	23791.6	39759.6	39092.2	16087.2	19547.7	39938.8	15828.1	18894.4	11361.5
Dihydroxyacetone phosphate	169.0 -> 97.0	4266.12	3463.65	4571.62	4275.6	2418.21	4450.36	4173.37	2831.26	1240.65	1951.97
DL-2-Aminoadipic acid	160.1 -> 116.0	42.238	46.3539	66.4168	177.444	96.5695	24.149	73.2153	77.7181	139.022	155.4
DL-Glyceraldehyde 3-phosphate	169.0 -> 97.0	27.3727	37.8595	58.5966	158.536	51.4535	31.593	63.1849	12.6513	14.7758	6.04271
DL-Isocitric acid	191.0 -> 111.0	2.19891e+06	1.98949e+06	997039	985545	698995	1.18209e+06	783129	1.07802e+06	1.51364e+06	771750
D-Maltose	341.1 -> 161.0	79.8163	355.831	172.155	535.629	116.34	240.12	297.133	241.179	70.1511	133.027
D-Mannose	179.1 -> 89.0	18530.1	46829.4	18524.7	33107.9	698.99	13967	658.183	923.067	1631.38	26243.4
D-pantothenic acid	218.0 -> 88.0	79124	80430.7	102220	106078	55044.6	96083.1	62468.1	47512.3	91991.2	84325.8
D-Ribose 5-phosphate	229.0 -> 79.0	6770.39	10716.9	13745.2	7367.66	4588.27	8740.69	5202.72	2378.52	1226.58	493.942
D-Ribulose 1,5-biphosphate	308.9 -> 79.0	116.684	140.612	927.08	144.557	78.1294	910.467	310.016	93.3693	229.605	74.2221
D-Sedoheptulose-7-phosphate	289.0 -> 96.9	82175.1	81448.7	98518.3	92825.6	50607.4	94327.3	122594	64293.4	53625.7	57366.2
D-Xylose	149.1 -> 89.0	2521.38	1070.05	2931.87	2170.78	4460.95	3135.5	2627.86	1731.28	2772.48	4109.19
D-Xylulose-5-phosphate	229.0 -> 79.0	10001.8	7579.56	11324.1	8352.67	11741.5	13521	8050.86	6583.42	6159.17	8372.62
Epicatechin	289.1 -> 245.0	380.259	116.412	43.4968	72.8273	146.341	2233.37	104.253	61.1612	70.9296	180.072
Flavin adenine dinucleotide	784.1 -> 437.0	72.9195	951.235	819.306	102.181	117.344	108.679	736.17	42.4941	72.4984	281.778
Folinic acid	472.2 -> 315.0	37.1489	24.3839	1.47325	25.3636	0.446864	1.24013	0.333422	13.9954	0.163814	2.19654
G3P	171.0 -> 79.0	488779	568200	883068	889877	589640	577007	658807	402505	260886	254796
Galactonic acid	195.1 -> 129.0	2259.27	819.246	981.547	1601.88	734.102	1408.54	2786.39	124.681	484.653	435.476
gamma-Aminobutyric acid	102.0 -> 84.1	748.592	1130.19	933.598	1791.86	1356.05	317.083	795.288	847.827	667.458	1306.4
gamma-Glu-Cys	249.1 -> 128.0	1862.53	1956.54	2604.02	2596.52	2085.01	2785.01	5367.05	746.663	502.584	986.088
GlcNAc	220.0 -> 160.0	53.4292	98.5717	127.117	24.0499	777.104	59.4175	202.855	28.7379	21.0743	338.57
Glucoheptonic acid	225.1 -> 129.0	59.4044	95.2264	94.975	88.9413	52.6307	13.665	23.2142	57.9877	41.7337	257.406
Glutathone red	306.1 -> 143.0	573655	568933	1.02635e+06	1.0697e+06	809360	2.20476e+06	3.29533e+06	442955	190205	553212
Glyceric acid	105.0 -> 57.2	94.4075	275.083	529.174	251.753	513.994	251.464	181.547	216.329	41.0919	249.377
Glyoxylic acid	73.0 -> 45.2	20.2597	4.57558	21.6418	7.18476	23.2764	30.8043	39.8593	30.443	25.2775	7.6864
Guanine	150.0 -> 133.0	349.454	580.315	496.416	209.954	364.518	109.071	96.8112	628.673	442.529	612.052
Guanosine 3,5-cyclic monophosphate	344.0 -> 150.0	1779.56	469.414	219.108	483.673	361.886	509.552	523.629	1239.92	1654.56	608.95
Guanosine 5-diphosphate	442.0 -> 158.9	8356.1	3707.56	6418.3	7321.78	1718.08	3255.09	2525.9	1041.9	900.897	2337.91
Guanosine 5-triphosphate	522.3 -> 424.0	59.483	33.3718	75.3194	20.6152	47.8084	194.396	84.7664	40.9059	73.4946	30.0134
Guanosine	282.1 -> 150.0	18.1048	9.45506	15.8152	30.5146	16.8616	2.6542	13.3457	2755.25	4.38081	18.9368
Homocitrate	205.0 -> 125.0	17426.9	29208.4	9732.57	5205.99	7034.22	10370.4	7477.48	10934.4	6993.31	7332.93
Hypoxanthine	135.0 -> 92.0	308.773	2875.91	3834.6	408.862	1416.8	709.672	423.494	947.148	112.249	403.756
Indoline-2-carboxylate	162.1 -> 118.0	588.929	286.74	143.456	148.527	246.652	307.355	101.82	195.284	56.7726	124.443
Inosine 5-diphosphate	427.0 -> 158.9	15711	15726.6	17428.3	15424.4	3762.9	15390.8	14196	6601.15	8104.6	5297.18
Inosine 5-monophosphate	347.0 -> 79.0	10722.6	4210.41	8463.98	6619.49	9385.6	13301.7	12493.4	10905	7321.19	7796.77
Inosine 5-triphosphate	507.0 -> 409.0	414.169	49.9045	982.695	108.17	49.8928	22.2736	222.52	52.412	97.2434	160.011
Inosine	267.1 -> 108.0	447.22	6.15189	10.3556	0.253697	4.84454	954.381	10.1309	12.4158	171.966	5.93677
Isopentenyl pyrophosphate	245.0 -> 209.0	56.2988	45.2135	26.3236	16.7145	49.5285	17.0843	25.7125	29.5081	8.61983	0.846312
Isopentyl acetate	129.1 -> 85.2	49956.2	36130.2	16796.9	11723.1	7617.86	9354.08	28226.9	14519	22103.4	10479.2
Itaconic acid	129.0 -> 85.1	62100.8	45428.1	48330.7	49460.7	39618.4	52094.3	82853.8	62537.8	65681	48649.9
Ketoisovaleric acid	115.0 -> 71.2	81.4102	107.435	302.806	416.119	145.63	363.862	199.342	219.088	97.3401	79.9615
Ketovaleric acid	115.0 -> 71.2	792.838	799.11	2123.73	709.9	1150.08	1862.57	4014.94	1908.19	16820.9	1686.52
Lactic acid	89.0 -> 43.3	711103	605694	766252	773119	885384	808197	808807	780771	577122	592855
L-Arabinose	149.0 -> 59.2	1792.78	205.85	766.332	1742.85	273.625	841.054	295.118	229.477	1149.55	558.191
L-Arabitol	151.0 -> 89.0	73.415	84.2735	61.339	158.732	177.608	339.624	527.026	139.493	137.315	71.7729
L-Arginine	173.1 -> 131.0	1069.31	741.308	467.935	1369.85	1016.39	1078.18	2097.94	1057.3	424.475	95.699
L-asparagine	131.0 -> 113.0	381.853	552.786	422.588	101.013	430.087	63.584	229.302	227.247	245.196	563.297
L-Aspartic Acid	132.0 -> 88.0	2.67723e+06	2.86674e+06	3.93537e+06	4.39859e+06	1.03035e+06	1.08047e+06	905088	737048	704556	643552
L-Canavanine	175.1 -> 74.0	3.6311	4.27633	9.5803	1.14222	0.746392			16.5812		1.05905
L-Carnitine	220.1 -> 146.0	3802.48	3256.61	3145.23	4008.62	3554.82	3005.29	3595.97	3110.2	2557.68	3419.48
L-Citrulline	174.1 -> 131.0	651.934	863.594	564.16	540.394	591.623	536.268	748.844	859.641	757.861	76.1122
L-Cystathionine	221.1 -> 134.0	13.9352	37.1379	2.1499	31.733	40.9427	10.4298	4.72445	10.7736	31.7586	25.8096
L-Cystine	239.0 -> 74.1	37.114	109.985	85.8145	60.9752	74.0221	41.9818	34.2511	28.2424	170.926	20.645
L-Dihydroorotic acid	157.0 -> 113.0	57.9022	87.7006	229.565	396.443	498.44	73.4065	136.067	325.741	74.0558	98.8511
L-Glutamic acid	146.0 -> 102.0	1.57928e+06	1.51314e+06	1.69523e+06	469790	1.49897e+06	1.27544e+06	1.32028e+06	1.09033e+06	1.18752e+06	3.01285e+06
L-Glutamine	145.1 -> 127.0	23559	27837.2	27027.9	23127.7	27991.1	25130.8	15679.9	26038.5	25739.8	30581.8
L-Gluthathione (oxidized)	611.1 -> 306.1	768922	474162	890300	757517	511757	822902	642355	678368	476606	591617
L-Histidine	154.1 -> 93.1	565.177	36.1027	585.05	783.738	446.131	356.698	335.149	394.386	88.4368	110.551
L-Homocysteine	134.0 -> 116.9	0.595537	0.542659		0.915589	3.15093		0.73974	0.798012	0.662789	0.675715
L-Homocystine	267.0 -> 115.0	54.7832	18.1422	29.4418	28.8698	70.4309	13.1597	2.57011	5.03663	34.8439	1.33327
L-Homoserine	118.0 -> 72.1	11.1874	16.7428	24.6559	27.7355	30.4714	33.5428	65.0388	40.4813	37.9596	34.0489
L-Hydroxyglutaric acid	147.0 -> 128.9	192214	208041	241379	245773	267196	296093	274754	212086	204022	216786
Lipoamide	204.1 -> 158.0	58.2259	4.62323	6.51295	7.69918	49.1155	29.2955	14.3648	11.5939	26.1503	32.058
L-Isoleucine	130.0 -> 45.0	41.9591	201.113	136.668	107.579	57.0172	59.1545	103.192	103.179	203.735	332.765
L-Kynurenine	207.1 -> 190.0	27.9173	13.0254	35.7293	111.835	33.5074	50.4636	36.8529	15.176	5.23907	132.849
L-Leucine	130.0 -> 45.0	41.9591	201.113	136.668	107.579	57.0172	59.1545	103.192	103.179	203.735	332.765
L-Malic acid	133.0 -> 115.0	3.37183e+06	3.37334e+06	4.90616e+06	4.75585e+06	4.57781e+06	4.63448e+06	4.26647e+06	3.42114e+06	3.10711e+06	2.35239e+06
L-Methionine	148.0 -> 47.2	21071.6	24144.6	32103.1	35239.9	21447.6	37981.9	40243.5	18060.7	9329.04	12106.2
L-Phenylalanine	164.1 -> 147.0	84726.4	75091.4	144120	114950	85298.2	119431	150744	65869.3	40148.8	66502.7
L-Proline	114.0 -> 68.1	214.834	230.952	225.618	197.615	106.501	485.667	152.101	136.521	106.873	84.3399
L-Serine	104.0 -> 74.1	894.206	982.91	1207.45	1132.09	1463.67	1543.19	1435.01	616.203	1403.17	1464.68
L-Sorbose	179.1 -> 89.0	15372.6	26253.2	5609.8	4556.42	383.764	1970.23	3183.65	1443.2	4268.79	1003.64
L-Threonine	118.0 -> 74.1	1923.06	4135.64	3063.62	2102.65	1199.91	3767.29	2601.1	1282.34	945.187	1265.87
L-Tryptophan	203.1 -> 116.0	54392	25681.6	44414.5	24451.2	23387.3	39159	37495.1	24742.7	15418	30172.3
L-Tyrosine	180.0 -> 119.0	34449.2	28996.1	44043.8	46855.7	21822.9	47455.8	49143	22351.9	9961.73	10112.9
Maleic acid	115.0 -> 71.2	20032.8	24045.3	30494.9	23308.8	35377.5	36104.6	34532.1	34075.2	25647	36360.6
Malonic acid	103.0 -> 59.2	149605	170991	163230	169733	159536	188294	168766	151673	166134	154909
Melibiose	341.1 -> 89.0	37.957		24.6311	85.0564	49.7351	132.52		10.4411	41.5511	117.322
Mevalonic acid 5-phosphate	227.0 -> 79.0	1675.5	914.677	696.981	815.874	318.587	616.415	1189.86	378.581	2724.74	762.971
Mevalonic acid	147.1 -> 128.9	109.041	87.0068	132.269	330.559	233.595	270.535	33.5914	39.7776	105.468	49.4364
m-Hydroxybenzoic acid	137.0 -> 65.2	25.9328	10.4623	3.08122	24.2033	11.8871	6.82056	22.7271	12.1768	10.5206	13.6251
myo-Inositol	239.1 -> 179.0	291492	129233	634785	800345	44025.2	204802	339329	244213	300003	456697
N-Acetyl D-galactosamine	220.1 -> 119.0	488.965	189.146	313.097	437.866	589.212	695.73	568.466	357.563	614.05
N-Acetyl-alpha-D-glucosamine 1-phosphate	300.0 -> 79.0	2226.92	1105.77	4392.36	580.022	743.416	5314.1	5960.16	2675.57	380.76	3748.17
N-acetylaspartate	174.0 -> 88.1	4.09301e+06	4.83654e+06	5.17017e+06	5.36105e+06	3.76045e+06	3.85802e+06	3.23254e+06	3.05227e+06	3.02995e+06	2.76352e+06
N-acetylaspartylglutamate	303.1 -> 285.0	1.94348e+06	2.48568e+06	2.37935e+06	2.73807e+06	1.86423e+06	1.80066e+06	1.5523e+06	1.47343e+06	1.51678e+06	1.46297e+06
N-Acetyl-D-glucosamine 6-phosphate	300.0 -> 79.0	16106	9314.83	13189.8	7933.61	10734.2	5565.85	10484.8	7237.17	2917.45	9454.16
N-Acetylglutamic acid	188.1 -> 128.0	26039.1	28983.2	30953.1	34870.2	23637.1	21802.1	20928.9	16234.3	16831.6	14232.7
N-Acetylneuraminic acid	308.1 -> 87.0	234.575	252.779	300.686	3582.73	145.599	594.586	307.491	664.972	658.95	460.624
NADH	664.1 -> 397.0	2322.04	3809.5	5587.21	8334.69	7140.38	2495.2	3324.13	1638.02	1288.17	1052.49
NADP+	742.1 -> 620.0	146.811	666.278	1500.33	744.185	271.002	391.617	177.053	351.212	538.009	263.076
NADPH	744.1 -> 426.1	11.7051	9.10167	0.0772765	0.104025	0.858687	0.319459	8.82522	0.740274	22.1103	2.85737
N-Carbamoyl-DL-aspartic acid	175.0 -> 88.1	117413	133148	139800	147366	103008	110450	91697.5	85324.7	84190.5	74077
N-Carbamyl-L-glutamic acid	189.1 -> 146.0	1508.62	1781.07	1811.47	2481.51	1598.47	3648.02	3010.26	1597.04	1456.82	887.549
N-Formyl-L-Tyrosine	208.1 -> 164.0	10.7552	77.2472	57.8078	12.2969	66.1412	67.0875	195.661	46.8037	45.3931	119.785
Nicotinic acid mononucleotide	334.0 -> 79.0	25.3903	21.5799	58.9542	19.8239	46.5291	13.6623	156.566	20.5401	15.4874	68.8401
Nicotinic acid	122.0 -> 78.1	35.3549	23.4082	37.5103	12.9968	21.9306	77.5167	14.172	28.3099	15.747	40.9047
o-Hydroxy hippuric acid	194.0 -> 150.0	78.3283	77.0635	54.3002	13.5189	85.6407	75.7149	93.9293	19.6782	63.733	101.714
o-Phospho-L-Serine	184.0 -> 79.0	7.61774	4.56316	12.0618	9.3454	15.3843	8.92882	17.8801	8.6589	11.0465	26.9449
O-Phosphorylethanolamine	140.0 -> 79.0	93765.4	118000	107056	115379	95646.3	87797.1	73868.4	91691.7	105340	99788
Orotic acid	155.0 -> 42.0	224.512	261.481	511.849	471.103	259.661	388.163	202.61	164.951	50.4766	120.965
O-Succinyl-L-homoserine	218.1 -> 117.0	9.99666	53.5249	127.805	272.494	154.975	216.29	48.4892	126.866	26.4634	173.817
Oxamic acid	88.0 -> 42.3	22.9377	8.1747	8.4077	22.6911	13.505	15.8996	16.2631	12.7901	7.27418	4.21725
Phenylpyruvic acid	163.0 -> 91.1	156.814	66.1519	1853.63	2141.81	475.932	507.714	241.025	191.903	1691.5	31.1251
Phosphoenolpyruvic acid	167.0 -> 79.0	44606.4	97665	158596	154052	79764.4	59820.2	67713	41750	57946.3	51106.3
Prephenic acid	225.0 -> 101.0	295.228	152.422	140.132	37.67	193.221	132.639	79.0501	334.279	326.137	43.035
Pyridoxal 5 phosphate	246.0 -> 79.0	77.414	14.4671	11.3466	38.3231	51.0729	210.476	200.808	69.7901	187.351	417.489
Pyridoxal hydrochloride	166.1 -> 138.0	17.0935	40.6338	16.8903	16.1079	8.02598	8.47426	25.6613	16.1876	40.0135	26.5954
Pyridoxamine	167.1 -> 121.0	16.1375	45.6045	8.56702	17.4664	19.3341	18.3718	14.9478	26.5114	40.2989	16.4641
Pyridoxine	168.1 -> 122.1	60.0804	3.91567	10.0017	24.0338	42.803	30.6652	48.7563	37.8773	10.4452	24.207
Pyruvic acid	87.0 -> 43.2	41180.5	22747.3	15467.2	17733.2	21692.9	56397.9	36735.6	40199.4	27578.3	33768.3
Quinic acid	191.1 -> 85.1	23.1286	117.558	97.3594	141.913	37.8681	77.0357	6.4281	25.0514	18.0234	12.6714
Riboflavin	375.1 -> 255.0	104.857	25.9047	30.5661	143.913	55.9452	41.1668	6.7537	81.3566	34.8366	22.7065
Ribonic acid gamma lactone	147.0 -> 59.2	132.468	187.974	158.067	46.9444	47.0399	150.684	34.8222	251.754	372.916	53.3377
S-2-Aminoethyl-L-cysteine	163.1 -> 76.1	2.38721	1.19376	0.298168	1.55723	0.867147	1.17869	0.696911	0.270498	0.809744	0.770669
S-5-Adenosyl-L-homocysteine	383.1 -> 134.0	1233.19	1664.5	1675.49	2059.2	1152.7	2785.75	3178.72	586.28	334.159	603.581
Salicylic acid	137.0 -> 93.1	31127.8	61164.9	58837.3	64000.7	45487	47481.8	48601.1	24888	28319.8	27802.6
Shikimic acid	173.0 -> 111.0	82.3485	72.376	2925.19	85.5284	2282.31	427.742	1121.42	387.775	174.685	72.9257
Succinic acid	117.0 -> 73.1	2.58924e+06	2.46861e+06	3.36649e+06	3.37118e+06	3.04968e+06	2.79013e+06	3.11765e+06	2.37199e+06	2.01565e+06	2.18724e+06
Succinic semialdehyde	101.0 -> 57.2	26.168	623.978	189.9	257.929	68.4628	1227.68	195.253	458.483	390.839	125.038
Taurine	124.0 -> 80.0	3.61822e+06	3.98545e+06	4.33201e+06	4.63743e+06	3.75148e+06	4.5762e+06	2.23056e+06	3.49179e+06	3.28624e+06	3.59504e+06
Taurocholic acid	514.0 -> 514.0	72.0946	38.5179	187.313	63.3597	56.9212	92.9225	54.1561	54.6064	23.0936	57.9622
Thiamine	264.1 -> 148.0	110.071	405.199	391.373	515.106	149.566	369.577	197.651	140.416	77.0573	79.9286
Thymidine 5-diphosphate	401.0 -> 97.0	112798	144052	141560	151890	85967.4	138580	133222	119132	126089	128438
Thymidine	241.1 -> 151.0	9.38822	16.1648	18.1477	88.5604	10.9681	7.34126	29.3314	61.2334	19.9448	10.7512
Thymine	125.0 -> 42.2	3.88034	8.53756	6.56789	14.894	4.17375	7.37619	5.52029	5.38391	2.10844	10.6784
trans-4-Hydroxy-L-proline	130.1 -> 128.0	186.4	132.346	207.78	37.3613	94.9975	129.11	104.785	65.7803	18.6631	58.1943
trans-Aconitic acid	173.0 -> 129.0	10361.1	20311.9	18025.5	27037.9	23898.4	86570.5	96199.5	14609.9	10219.3	68572
trans-trans Muconic acid	141.0 -> 53.3	12.1041	35.383	41.6369	16.3012	22.7379	17.6875	26.6387	5.44563	23.2333	30.1847
Trehalose 6-phosphate	421.1 -> 241.0	12.9031	3.94331	13.2085	42.4989	8.95684	15.1552	28.1921	29.7847	36.9803	8.98292
Trehalose	401.1 -> 341.0	1368.61	2486.33	496.376	1883.22	1793.13	1236.54		1484.43	949.174	1178.14
UDP-GlcNAc	606.1 -> 385.0	96268.5	82262.5	150966	148650	70637.1	123612	143363	64682.2	49650.1	62511.9
Uracil	111.0 -> 42.2	1172.73	679.784	375.543	774.833	504.525	914.441	545.518	329.281	48.6845	275.885
Uric acid	167.0 -> 124.0	161.124	150.383	2548.97	2743.14	3053.36	1406.95	134.306	70.2395	42.8003	104.847
Uridine 5′-diphosphogalactose	565.0 -> 322.9	649903	532614	965054	882611	563979	752430	901546	454198	333545	416707
Uridine 5-diphosphate	403.0 -> 158.9	23634.9	19534	25554	27829.3	12129.6	11839.4	23071	14750.9	10542.1	8195.9
Uridine 5-diphosphoglucose	565.0 -> 322.9	649903	532614	965054	882611	563979	752430	901546	454198	333545	416707
Uridine 5-monophosphate	323.0 -> 79.1	77426.2	58914.1	83241.6	105383	64435.9	144007	82613.2	56164.6	36900.9	50592.1
Uridine 5-triphosphate	483.0 -> 158.9	364.982	1636.01	58.4888	842.864	948.473	1451.91	1822.72	362.201	157.412	204.346
Uridine	243.1 -> 200.0	18115.6	26021.7	39687.1	46236.9	67017.9	23116.3	15883	12564.9	9155.18	11296.7
Vanillic acid	167.0 -> 123.0	259.295	582.436	855.512	204.184	369.44	398.48	491.339	238.158	350.05	113.452
Xanthine	151.0 -> 108.0	4149.49	4820.6	8655.06	5280.66	3021.92	4194.01	3722.35	1162.84	1380.08	3294.61
Xanthosine	283.1 -> 151.0	1745.54	1920.56	4087.62	3123.42	7887.02	2186.59	2458.76	1162.14	944.696	1352.66
Xylitol	151.1 -> 89.0	161.702	150.325	61.7043	52.1441	58.4062	339.48	527.15	139.493	115.059	162.899
